# Supplementary material
Source: publisher figshare collection journal article supplement (https://acs.figshare.com/ndownloader/files/26362080)
Supplement: Supplementary file 1 [file 26362080]

# Fluorinating Dopant-free Small-molecule Hole-transport Material to Enhance the Photovoltaic Property

*Yikai Wang<sup>a, ‡</sup>, Hui Ma<sup>b, ‡</sup>, Qiaoyun Chen<sup>b</sup>, Quan Sun<sup>a</sup>, Zhengxu Liu<sup>a</sup>, Zhe Sun<sup>a</sup>, Xuguang Jia<sup>a</sup>, Yuanyuan Zhu<sup>a</sup>, Shuai Zhang<sup>a</sup>, Jing Zhang<sup>a, \*</sup>, Ningyi Yuan<sup>a, \*</sup>, Jianning Ding<sup>a</sup>, Yi Zhou<sup>b, \*</sup>, Bo Song<sup>b, \*</sup>, and Yongfang Li<sup>b</sup>*

## Contents

1. Experimental section
2. DFT-calculation
3. The thermal, optical and electrical properties
4. Contact angles
5. The SCLC measurement
6. Cross-section SEM images
7. Performance of the PVK-SCs in different concentrations and annealing time
8. A summary of the reported *p-i-n* PVK-SCs based on DF-HTMs
9. Stability of the PVK-SCs based on BT-MTP
10. XPS of the core-level of I 3d spectra

## 1. Experimental section

### 1.1 Materials synthesis

All reagents were obtained from Beijing InnoChem Science&Technology Co. Ltd, Sun Chemical Technology(Shanghai) Co. Ltd, Xi'an Polymer Light Technology Corp. and Solarmer Materials Inc., respectively. The synthetic routes, mass and NMR spectra of BT-MTP and DFBT-MTP are as follows.

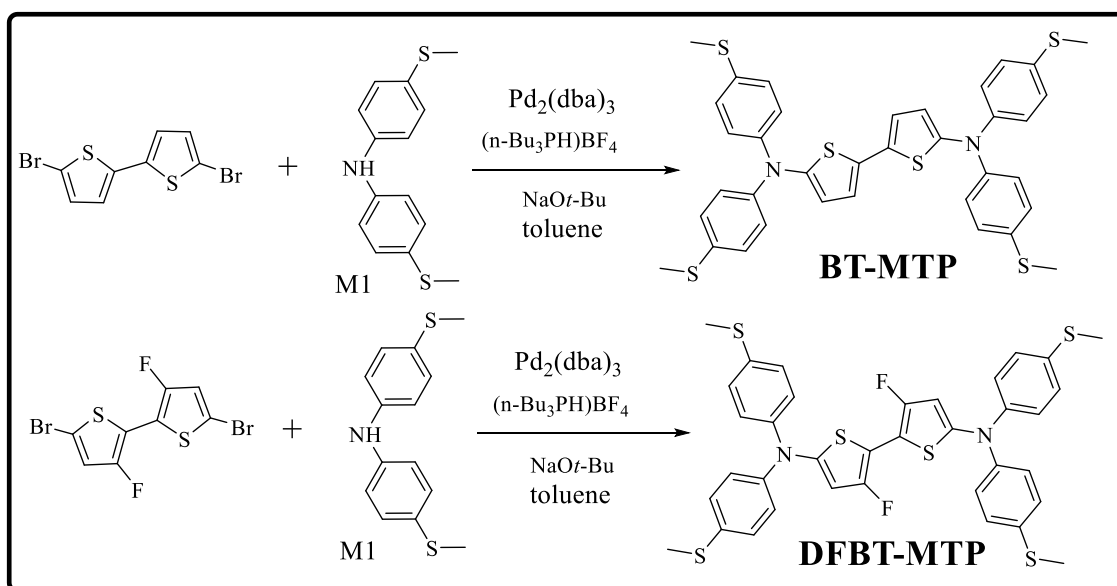

**Scheme S1.** Synthetic routes of BT-MTP and DFBT-MTP.

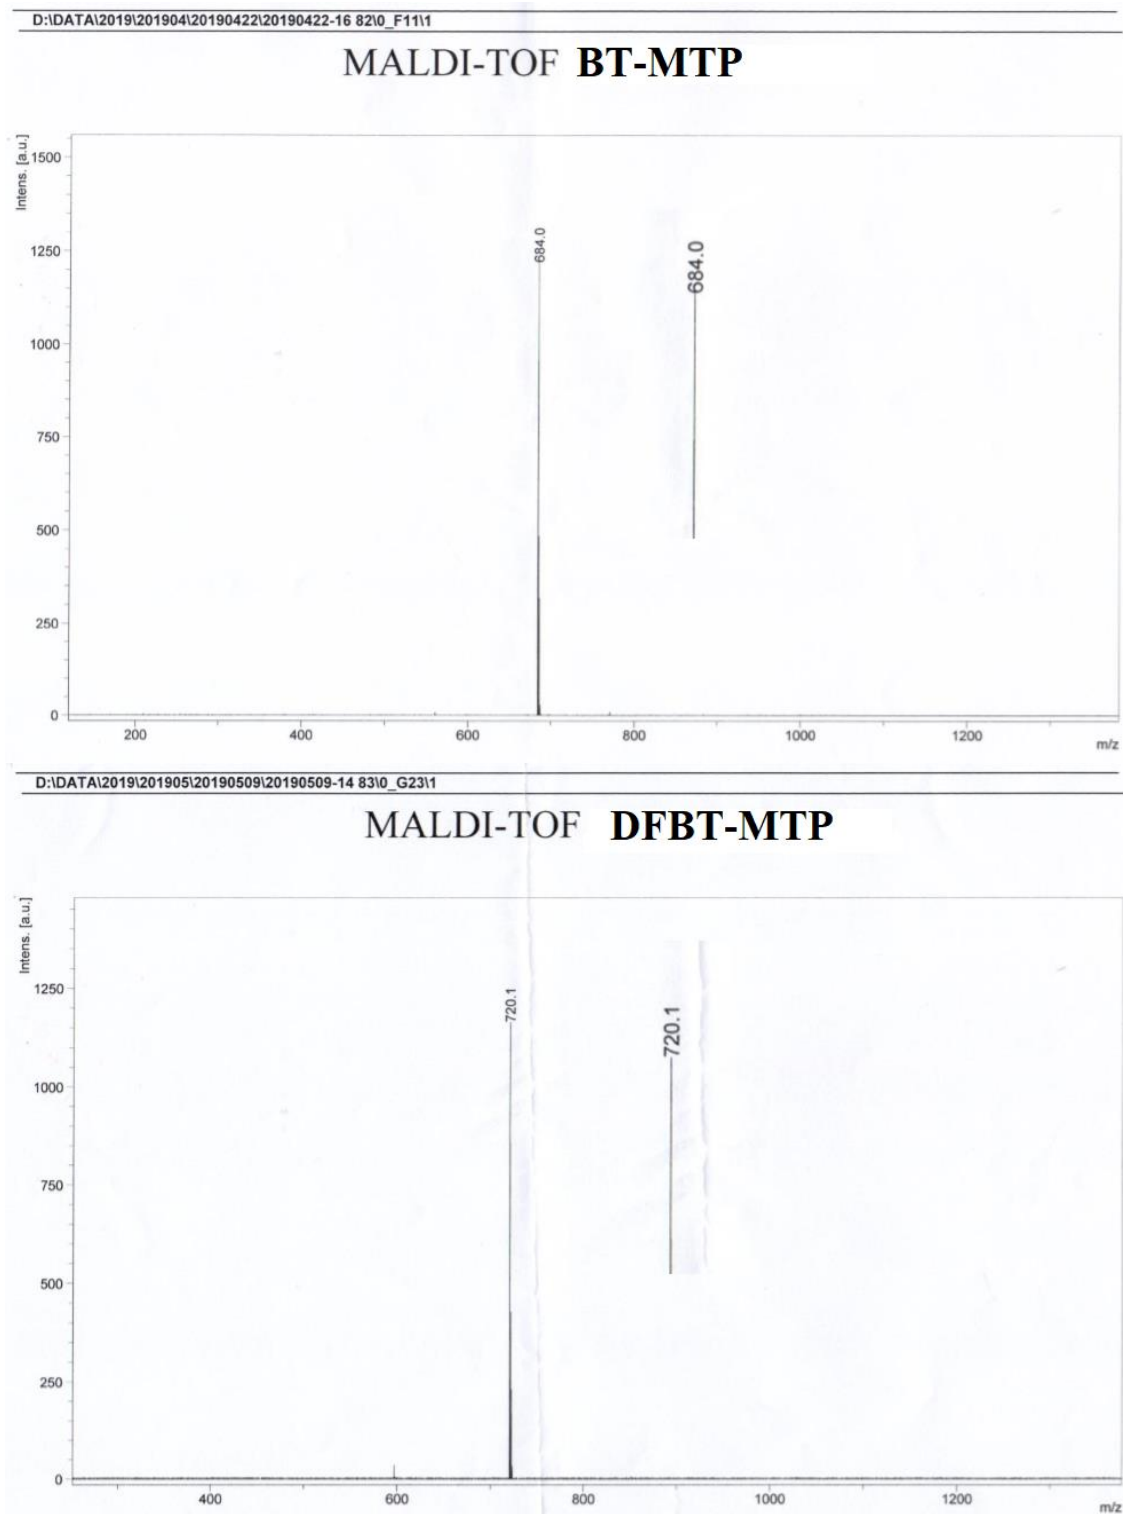

**Figure S1.** MALDI-TOF mass spectrometry of BT-MTP and DFBT-MTP.

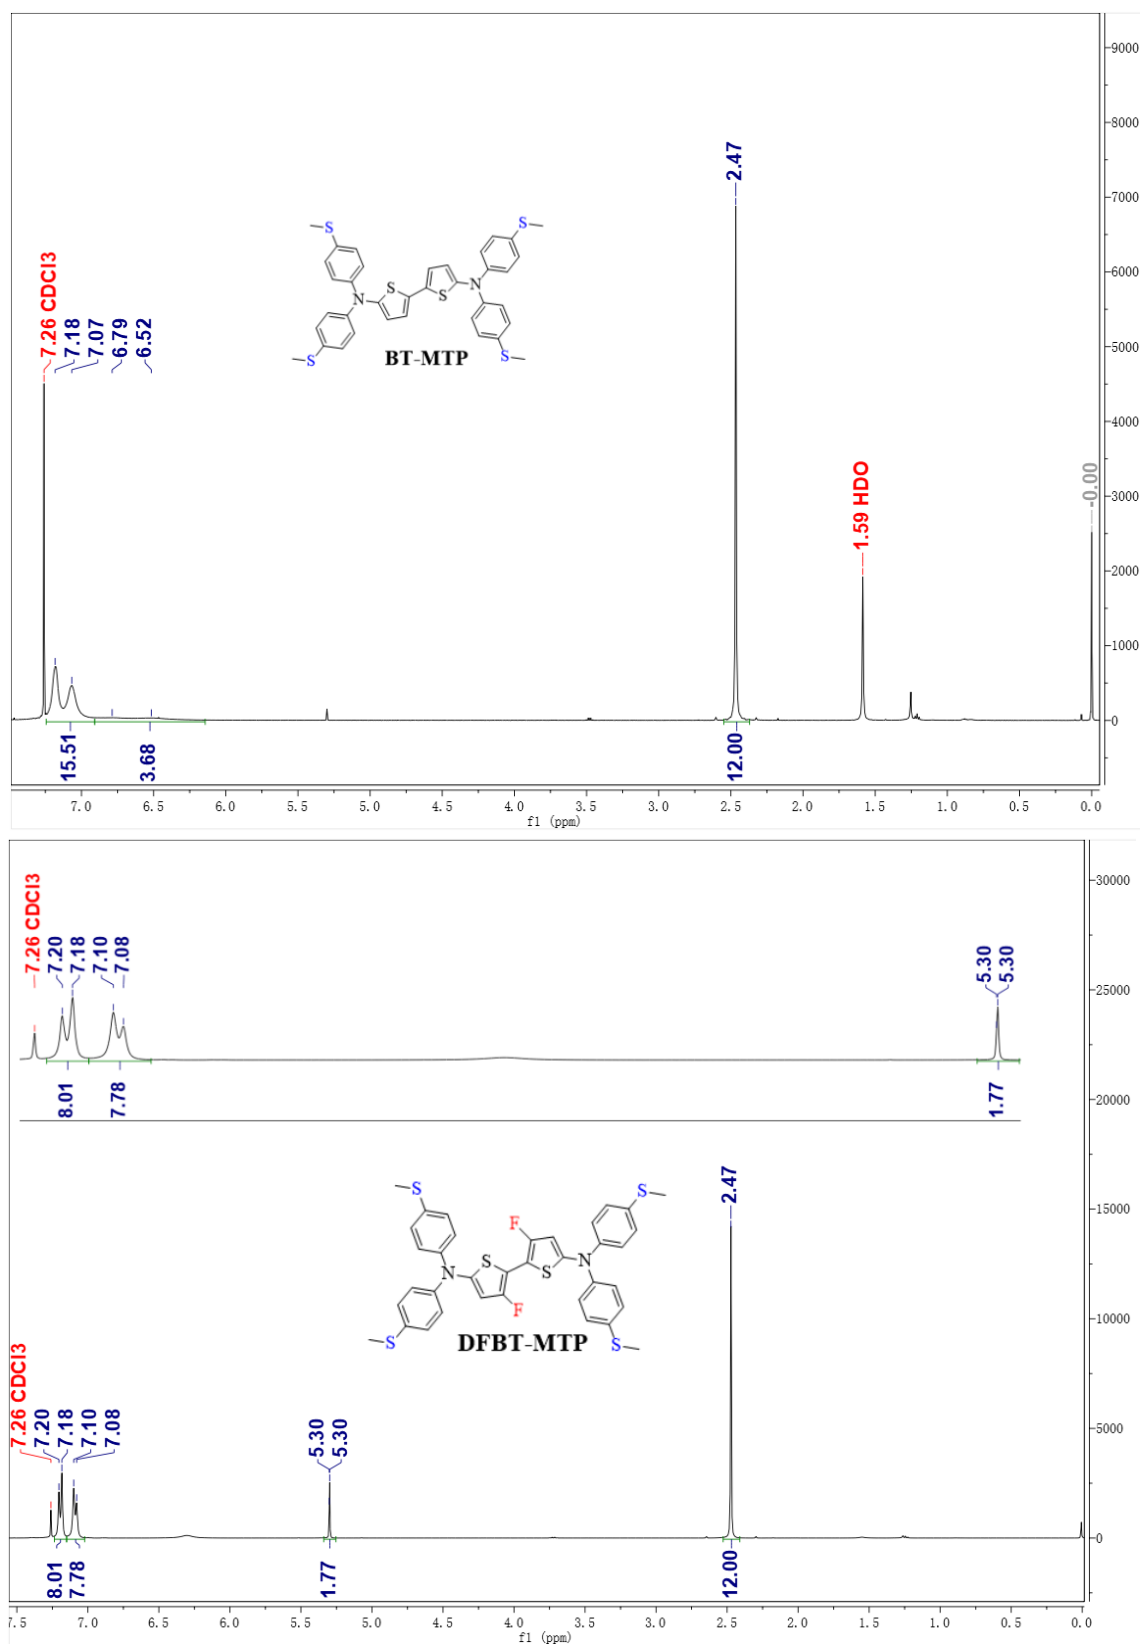

Figure S2. <sup>1</sup>H NMR spectra of BT-MTP and DFBT-MTP.

## 1.2 Measurements and instruments

MALDI-TOF spectra, NMR spectra, absorption spectra and the electrochemical cyclic voltammogram were recorded on Bruker BIFLEX III, Bruker DMX-500, Hitachi U-3010 UV-vis spectrophotometer and Zahner IM6e electrochemical workstation, respectively. The CV measurement taken with a platinum sheet, platinum wire, and Ag/Ag<sup>+</sup> electrode as working electrode, counter electrode, and reference electrode, respectively. The CV tests were conducted in a 0.1 M chloroform solution of Bu<sub>4</sub>NPF<sub>6</sub>. During the measurement, ferrocene/ferrocenium (Fc/Fc<sup>+</sup>) was used as an internal standard, which was assigned an absolute energy of 4.74 eV versus vacuum level. The thermal stability was measured on HTG-1. The FTIR Spectra were measured on Nicolet-460. The XRD spectra were tested on D2 PHASER (Bruker, Germany). The XPS spectra were tested on Thermo Escalab 250Xi X-ray photoelectron spectrometer using 300W Al K $\alpha$  radiation under a pressure of  $\sim 3 \times 10^{-9}$  mbar. The SEM images were tested on Dimension V and SUPRA8010, respectively. The *J-V* curves of PVK-SCs were recorded using a Keithley 2400 source meter in a glove box filled with N<sub>2</sub>. The measurement was conducted under AM 1.5G solar illumination with an intensity of 100 mW cm<sup>-2</sup> at a scan speed of 10 mV s<sup>-1</sup>. Shadow masks were clung to the substrate to define an active area of 0.0757 cm<sup>2</sup>. A solar simulator (500 W Xe lamp) (ORIEL Solar 3A94023A, America) is employed as the light source. The EQE curves were calibrated by using a solar cell spectral response measurement system (Enli Technology Co., Ltd, QE-R3011) in atmosphere conditions. Steady-state photoluminescence (PL) spectra were carried out on FLS 980 (Edinburgh Instrument, UK). Time-resolved PL measurements were acquired on Lifespec II (Edinburgh Instrument, UK). The Nyquist tests were carried out by an IM6 electrochemical workstation (Zahner Zennium, Germany) in the dark with a bias under the respective *V*<sub>oc</sub> of individual cells. All the devices were measured immediately after fabricated.

### 1.3 Device fabrication

ITO glass substrates were ultrasonically cleaned with deionized water, ethanol, acetone and isopropanol for 30 min, respectively, then dried with N<sub>2</sub>. Then followed by oxygen plasma cleaning for 20 min before using. The synthesized HTL materials (BT-MTP and DFBT-MTP) was dissolved in CB with a concentration of 10 mg mL<sup>-1</sup>. Then, it was spin-coated on the ITO/glass substrates at a speed of 5000 rpm for 35 s. The resulting HTL film was thermally annealed at 100 °C for 5 min. The perovskite layer was fabricated by a two-step method. PbI<sub>2</sub> precursor solution (Concentration of 1 mole/ml, dissolved in DMF) was stirred at 70 °C overnight on a hot plate. MAI precursor solution (MAI: MACl=10:1, 50 mg mL<sup>-1</sup>, dissolved in isopropanol) On the top of the HTL, the PbI<sub>2</sub> precursor solution was firstly spin-coated at 3500 rpm for 20 s. Then MAI and MACl mixed solution was spin-coated at 3500 rpm for 30 s above PbI<sub>2</sub> film. After that, the deposited films were thermally annealed at 90 °C for 8 min in a nitrogen-filled glove-box. Then the MAPbI<sub>3-x</sub>Cl<sub>x</sub>-based perovskite is formed. Because of the annealing process, parts of MACl were volatilized. We used thermally evaporated C<sub>60</sub>/BCP (2,9-Dimethyl-4,7-diphenyl-1,10-phenanthroline) double layers as cathode buffer layer in the device by vacuum evaporation under 2 x 10<sup>-4</sup> mbar; we considered that the BCP film as an electron-transporting and hole-blocking layer could realize enhancement of device performance. Finally, an Ag (800 nm) electrode was deposited on the BCP by vacuum evaporation under 2 x 10<sup>-6</sup> mbar. The device structure is ITO/DBTMT/MAPbI<sub>3-x</sub>Cl<sub>x</sub>/ C<sub>60</sub> (20 nm)/ BCP (8 nm)/Ag.

## 2. DFT-calculation

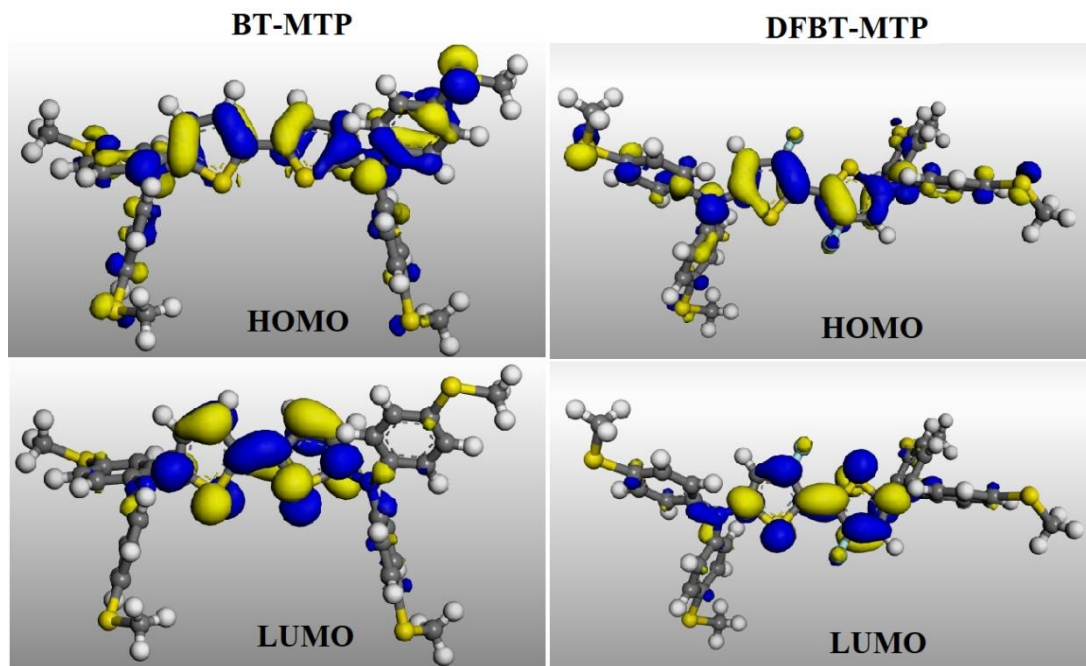

**Figure S3.** The DFT-calculated electronic structures, showing the HOMO and LUMO energy levels of BT-MTP and DFBT-MTP.

## 3. The thermal, optical and electrical properties

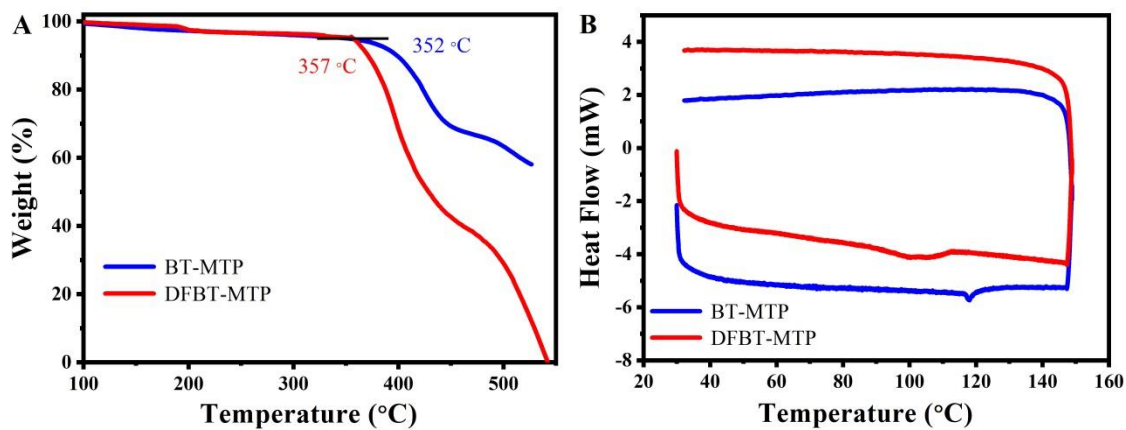

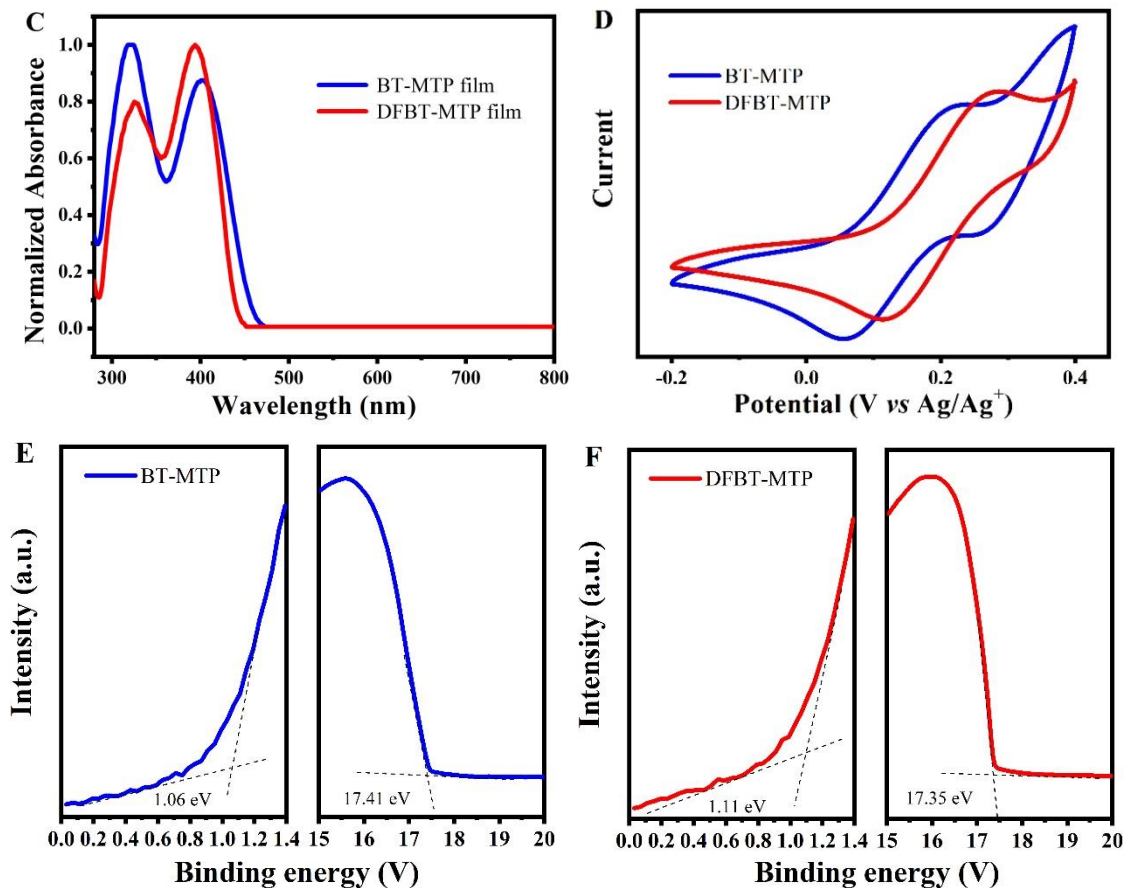

**Figure S4.** The TGA plots (A), the DSC plots (B), the UV-vis spectra (C), Cyclic voltammogram (D), UPS spectra (E, F) of BT-MTP and DFBT-MTP, respectively.

#### 4. Contact Angles

**Table S1.** The five times and average DMF droplets contact angles on the surface of the BT-MTP and DFBT-MTP film.

|          | 1   | 2   | 3      | 4     | 5     | Average |
|----------|-----|-----|--------|-------|-------|---------|
| BT-MTP   | 6 ° | 7 ° | 10.5 ° | 9.5 ° | 9 °   | 8.4 °   |
| DFBT-MTP | 7 ° | 9 ° | 10.5 ° | 7.5 ° | 8.5 ° | 8.5 °   |



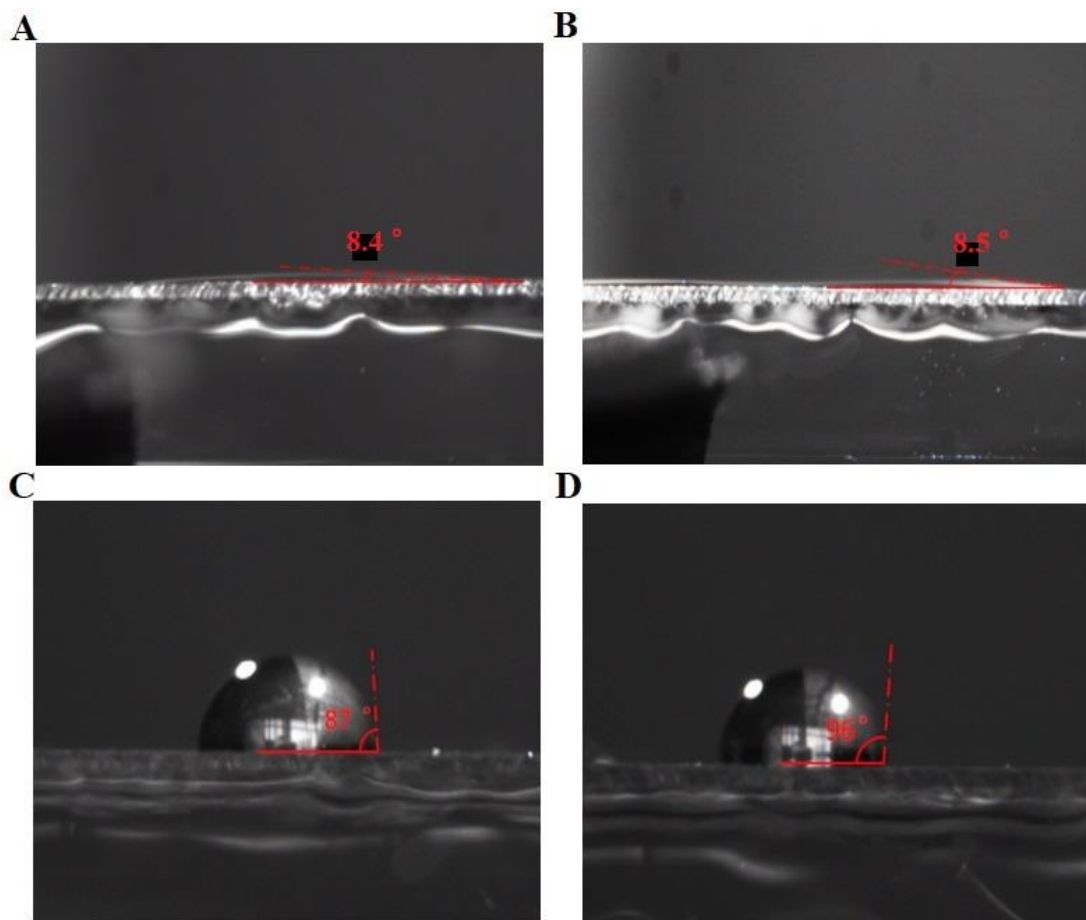

**Figure S5.** Images of the DMF droplets contact angles on the surface of the BT-MTP (A) and DFBT-MTP (B) film; images of the water droplets contact angles on the surface of the BT-MTP (C) and DFBT-MTP (D) film.

## 5. The SCLC measurement

The hole-transport mobility of BT-MTP and DFBT-MTP were measured by the SCLC technique. The ITO/PEDOT:PSS/dopant-free HTMs/MoO<sub>3</sub>/Al-structured device were fabricated, and the HTM layers were fabricated as same as the corresponding PVK-SCs. the hole mobility of HTMs were measured under dark conditions and the values were calculated using the Mott–Gurney law:

$$J = \frac{9}{8} \epsilon_r \epsilon_0 \mu \frac{v^2}{L^3}$$

## 6. Cross-section SEM images

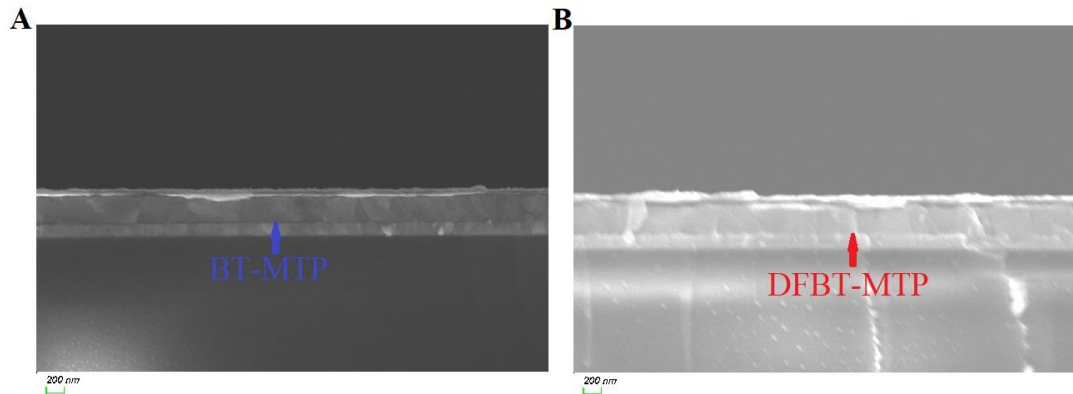

**Figure S6.** A-B: The Cross-section SEM image of the *p-i-n* PVK-SCs based on BT-MTP and DFBT-MTP, respectively.

## 7. Performance of the PVK-SCs in different concentrations and annealing time

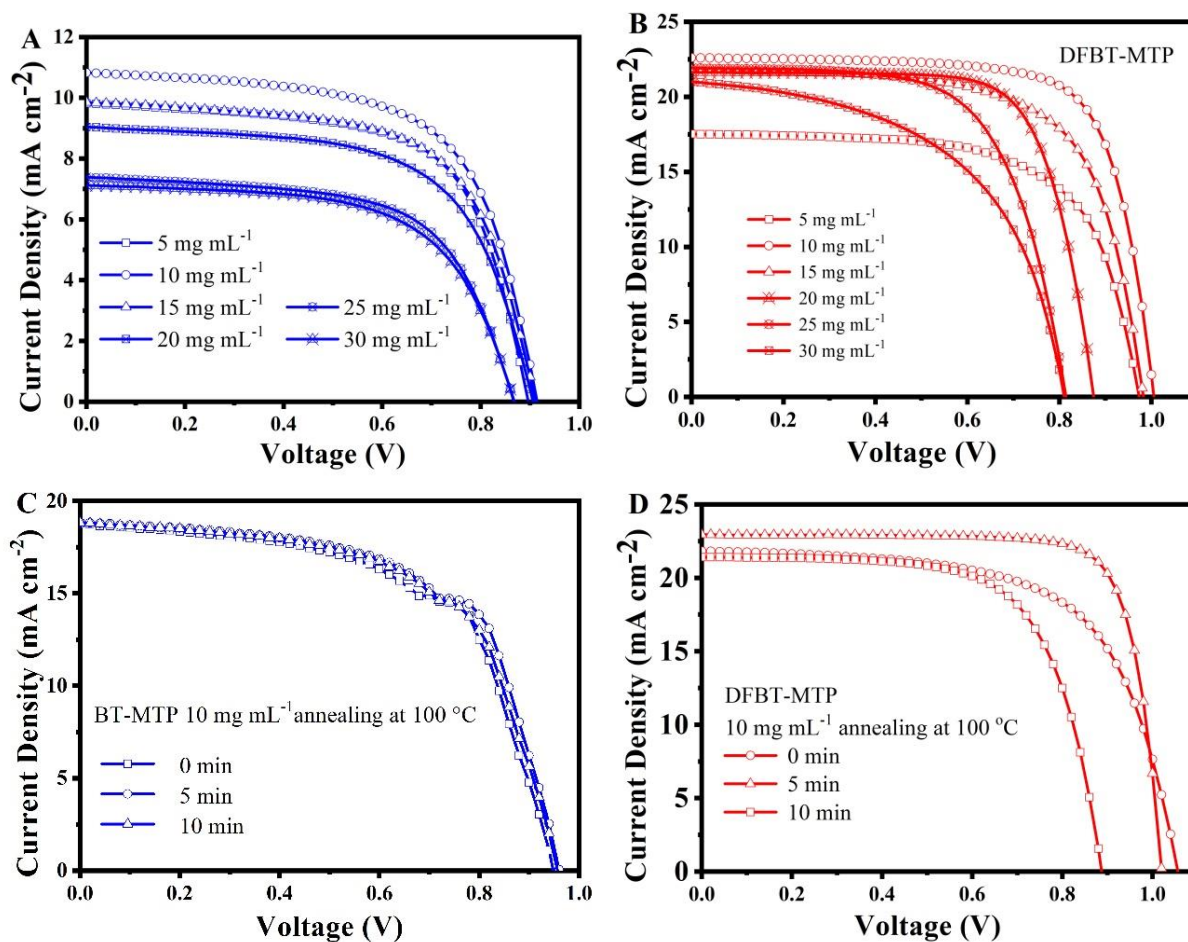

**Figure S7.** A-B: The  $J$ - $V$  curves of the  $p$ - $i$ - $n$  PVK-SCs prepared from different concentrations of BT-MTP and DFBT-MTP solution; C-D:  $J$ - $V$  curves of the  $p$ - $i$ - $n$  PVK-SCs prepared from different thermal annealing times at 100 °C of BT-MTP and DFBT-MTP films.

**Table S2.** Photovoltaic performance of the  $p$ - $i$ - $n$  PVK-SCs with BT-MTP HTL prepared from different concentrations and annealing time under the illumination of AM 1.5G, 100 mW cm<sup>-2</sup>.

| Concentration<br>(mg mL <sup>-1</sup> ) | Annealing time<br>(100°C) (min) | $J_{sc}$<br>(mA cm <sup>-2</sup> ) | $V_{oc}$<br>(V) | $FF$<br>(%) | PCE<br>(%) |
|-----------------------------------------|---------------------------------|------------------------------------|-----------------|-------------|------------|
| 5                                       | 0                               | 8.34                               | 0.88            | 65.63       | 4.82       |
| 10                                      | 0                               | 10.83                              | 0.91            | 63.09       | 6.25       |
| 15                                      | 0                               | 9.85                               | 0.91            | 63.64       | 5.71       |
| 20                                      | 0                               | 9.04                               | 0.91            | 62.36       | 5.11       |
| 25                                      | 0                               | 7.39                               | 0.87            | 62.15       | 3.99       |
| 30                                      | 0                               | 7.12                               | 0.87            | 61.39       | 3.79       |
| 10                                      | 0                               | 18.78                              | 0.95            | 61.20       | 10.90      |
| 10                                      | 5                               | 18.84                              | 0.96            | 62.20       | 11.26      |
| 10<br>(optimization)                    | 5                               | 20.87                              | 0.97            | 73.60       | 14.95      |
| 10                                      | 10                              | 18.83                              | 0.96            | 60.20       | 10.85      |

**Table S3.** Photovoltaic performance of the  $p$ - $i$ - $n$  PVK-SCs with DFBT-MTP HTL prepared from different concentrations and annealing time under the illumination of AM 1.5G, 100 mW cm<sup>-2</sup>.

| Concentration<br>(mg mL <sup>-1</sup> ) | Annealing time<br>(100°C) (min) | $J_{sc}$<br>(mA cm <sup>-2</sup> ) | $V_{oc}$<br>(V) | $FF$<br>(%) | PCE<br>(%) |
|-----------------------------------------|---------------------------------|------------------------------------|-----------------|-------------|------------|
| 5                                       | 0                               | 17.54                              | 0.97            | 65.41       | 11.17      |
| 10                                      | 0                               | 22.61                              | 1.00            | 73.52       | 16.71      |
| 15                                      | 0                               | 21.80                              | 0.98            | 67.09       | 14.37      |
| 20                                      | 0                               | 21.64                              | 0.87            | 72.50       | 13.73      |
| 25                                      | 0                               | 21.93                              | 0.81            | 64.69       | 11.55      |
| 30                                      | 0                               | 21.01                              | 0.81            | 53.25       | 9.07       |
| 10                                      | 0                               | 22.61                              | 1.00            | 73.52       | 16.71      |
| 10                                      | 5                               | 22.94                              | 1.02            | 79.28       | 18.56      |
| 10<br>(optimization)                    | 5                               | 23.01                              | 1.10            | 79.68       | 20.15      |
| 10                                      | 10                              | 21.41                              | 0.89            | 67.15       | 12.76      |

**Table S4.** Photovoltaic performance of the PVK-SCs based on BT-MTP and DFBT-MTP in reverse and forward scans under the illumination of AM 1.5G, 100 mW cm<sup>-2</sup>.

| DF-HTMs  |         | $J_{sc}$ (mA cm <sup>-2</sup> ) | $V_{oc}$ (V) | $FF$ (%) | PCE (%) |
|----------|---------|---------------------------------|--------------|----------|---------|
| BT-MTP   | Forward | 20.93                           | 0.96         | 70.9     | 14.20   |
|          | Reverse | 20.87                           | 0.97         | 73.6     | 14.95   |
| DFBT-MTP | Forward | 22.90                           | 1.08         | 79.36    | 19.73   |
|          | Reverse | 23.01                           | 1.08         | 79.61    | 19.88   |

## 8. A summary of the reported p-i-n PVK-SCs based on DF-HTMs

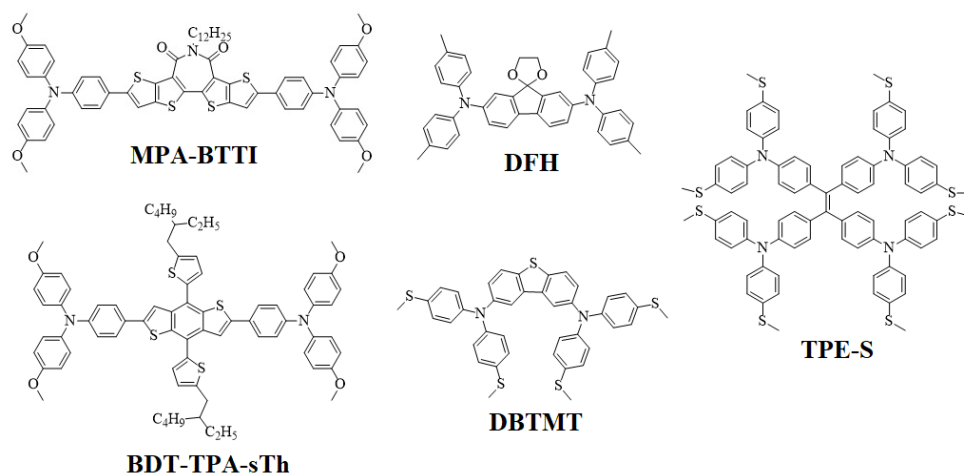

**Figure S8.** The structures of the DF-HTMs applied for *p-i-n* PVK-SCs with high efficiency reported.

**Table S5.** The performance parameters of the *p-i-n* PVK-SCs based on DF-HTMs reported.

| DF-HTMs<br>(small<br>molecules) | Perovskites                                                            | $J_{sc}$<br>(mA cm <sup>-2</sup> ) | $V_{oc}$<br>(V) | $FF$<br>(%) | PCE<br>(%) | Ref<br>(main text) |
|---------------------------------|------------------------------------------------------------------------|------------------------------------|-----------------|-------------|------------|--------------------|
| MPA-BTTI                        | CsFAMA                                                                 | 23.23                              | 1.12            | 81.4        | 21.17      | 6                  |
| DFH                             | MA <sub>0.9</sub> FA <sub>0.1</sub> PbI <sub>3-x</sub> Cl <sub>x</sub> | 22.7                               | 1.09            | 83.0        | 20.6       | 33                 |
| BDT-TPA-sTh                     | MAPbI <sub>3</sub>                                                     | 21.91                              | 1.03            | 79.02       | 17.83      | 34                 |
|                                 | SSG-G                                                                  | 22.87                              | 1.15            | 78          | 20.5       |                    |
| DBTMT                           | MAPbI <sub>3-x</sub> Cl <sub>x</sub>                                   | 22.7                               | 1.12            | 83.25       | 21.12      | 31                 |
| TPE-S                           | FA <sub>0.9</sub> Cs <sub>0.1</sub> PbI <sub>3</sub>                   | 23.3                               | 1.13            | 79.7        | 21.0       | 11                 |
| This work                       | MAPbI <sub>3-x</sub> Cl <sub>x</sub>                                   | 23.01                              | 1.10            | 79.68       | 20.15      |                    |

## 9. Stability of the PVK-SCs based on BT-MTP

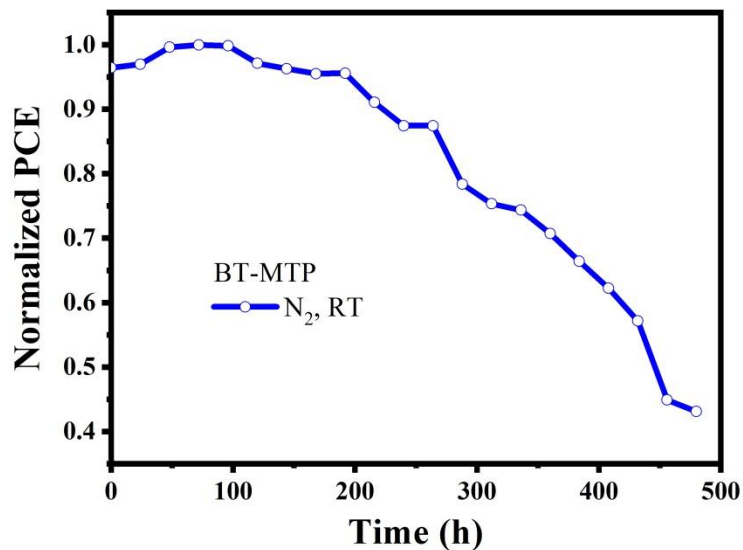

**Figure S9.** The stability of the PVK-SCs based on BT-MTP in nitrogen ambient at RT.

## 10. XPS of the core-level of I 3d spectra

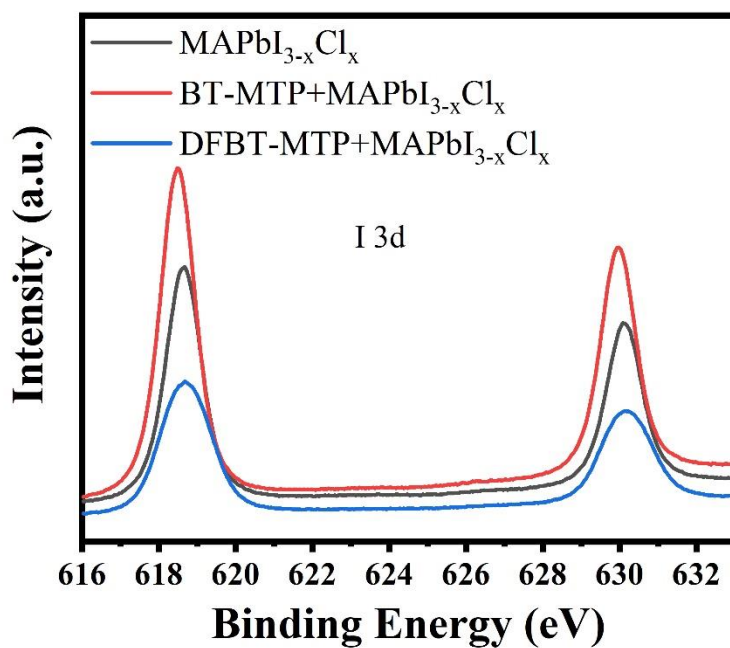

**Figure S10.** XPS of the core-level of I 3d spectra of MAPbI<sub>3-x</sub>Cl<sub>x</sub>@ITO, MAPbI<sub>3-x</sub>Cl<sub>x</sub>@BT-MTP and MAPbI<sub>3-x</sub>Cl<sub>x</sub>@DFBT-MTP films.

**Table S6.** The core-level of Pb 4f of MAPbI<sub>3-x</sub>Cl<sub>x</sub>@ITO, MAPbI<sub>3-x</sub>Cl<sub>x</sub>@BT-MTP and MAPbI<sub>3-x</sub>Cl<sub>x</sub>@DFBT-MTP films.

| Films                                          | Pb 4f<br>Binding energy (eV) | Pb 4f<br>Binding energy (eV) |
|------------------------------------------------|------------------------------|------------------------------|
| MAPbI <sub>3-x</sub> Cl <sub>x</sub> @ITO      | 137.88                       | 142.73                       |
| MAPbI <sub>3-x</sub> Cl <sub>x</sub> @BT-MTP   | 137.78                       | 142.63                       |
| MAPbI <sub>3-x</sub> Cl <sub>x</sub> @DFBT-MTP | 137.83                       | 142.72                       |
